# Supplementary material for: The surface-sulphurated Co3O4 nanowire array electrocatalyst for oxygen evolution reaction and water-splitting applications
Source: Royal Society of Chemistry journal article supplement (doi:10.1039/d2se01470j), 2022-12-12
Supplement: d2se01470j1.pdf [file d2se01470j1.pdf]

*Supplementary Information for :*

**The surface-sulphurated Co<sub>3</sub>O<sub>4</sub> nanowire array electrocatalyst for oxygen evolution  
reaction and water-splitting applications**

Junwei Li <sup>a</sup>, Yige Wang <sup>a</sup>, Wenwei Liu <sup>a</sup>, Zhenyi Liang <sup>a</sup>, Chunlei Fan <sup>a</sup>, Jinying Li <sup>a</sup>, Shengxu Luo <sup>a,\*</sup>, Haoxiong Nan <sup>a,d,\*</sup> and  
Jia Yu <sup>b,c,\*</sup>

<sup>a</sup> School of Science, Hainan University, Hainan 570228, China

<sup>b</sup> Materials Genome Institute, Shanghai University, Shanghai 200444, China

<sup>c</sup> Key Laboratory of Advanced Energy Materials Chemistry (Ministry of Education), College of Chemistry, Nankai University, Tianjin 300071, China

<sup>d</sup> The Key Laboratory of Fuel Cell Technology of Guangdong Province, School of Chemistry and Chemical Engineering, South China University of Technology, Guangzhou 510641, China

\* Corresponding authors: Shengxu Luo; Haoxiong Nan; Jia Yu

Email: [shxluo@hainanu.edu.cn](mailto:shxluo@hainanu.edu.cn); [nanhaoxiong@163.com](mailto:nanhaoxiong@163.com); [yujia@shu.edu.cn](mailto:yujia@shu.edu.cn)

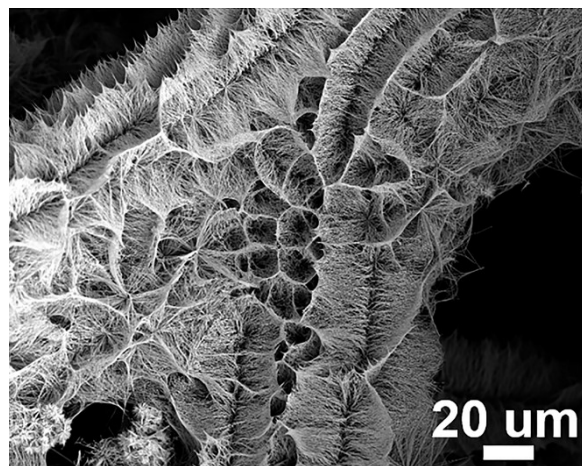

**Fig. S1.** SEM images of  $\text{Co}_3\text{O}_4/\text{NF}$ .

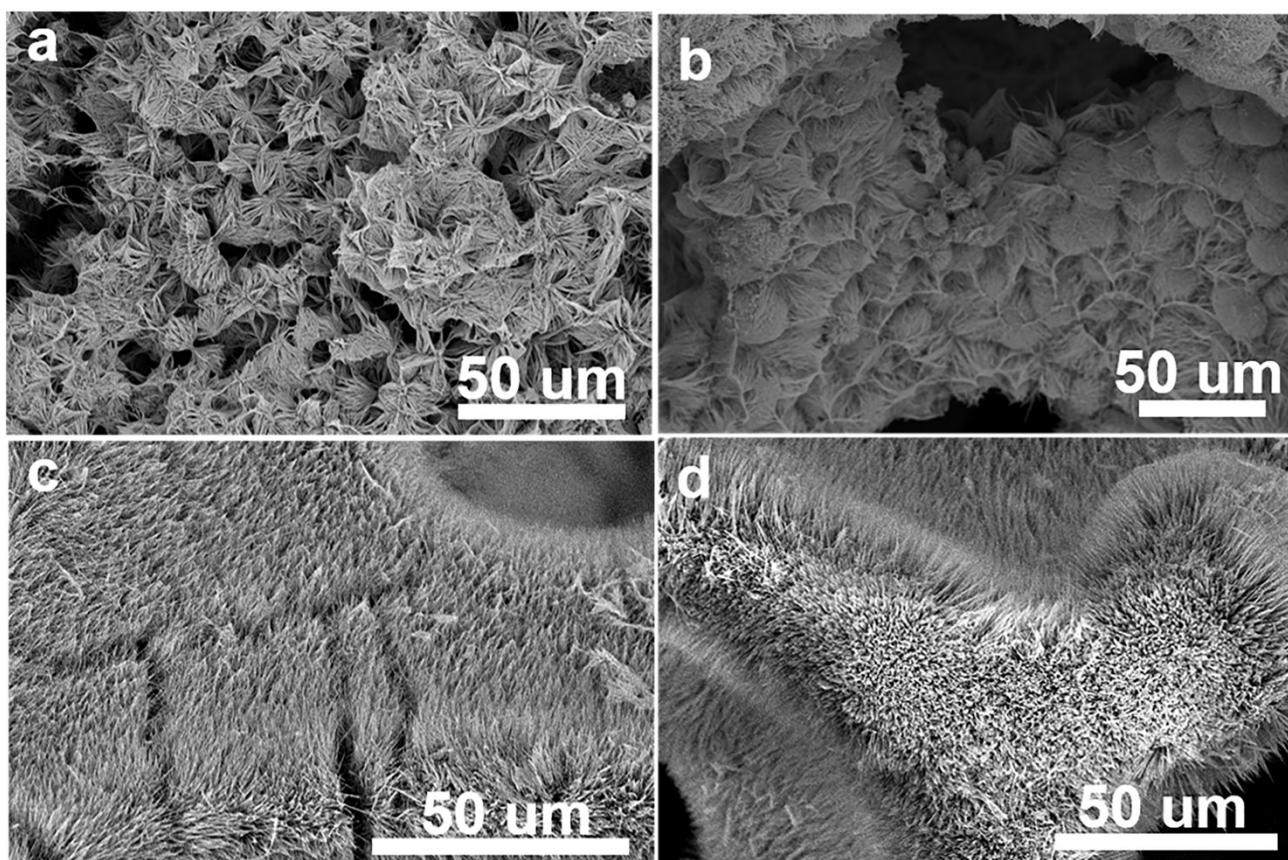

**Fig. S2.** SEM images of  $\text{Co}_3\text{O}_4\text{-S/NF}$  when cobalt nitrate hexahydrate: urea = 1:0.2 (a), 1:0.5 (b), 1:1 (c), 1:2 (d).

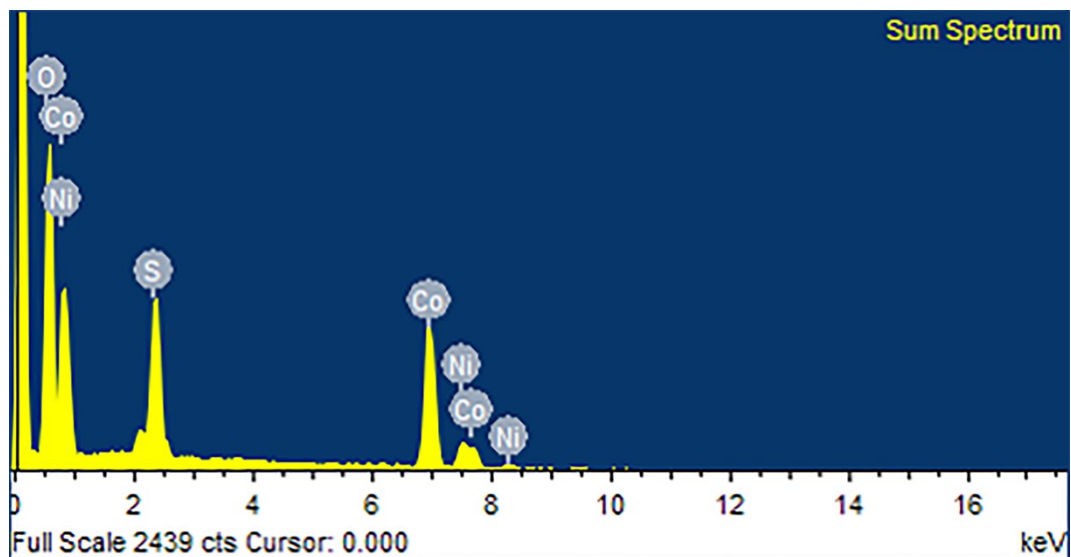

**Fig. S3.** EDS elemental mapping of  $\text{Co}_3\text{O}_4\text{-S/NF}$ .

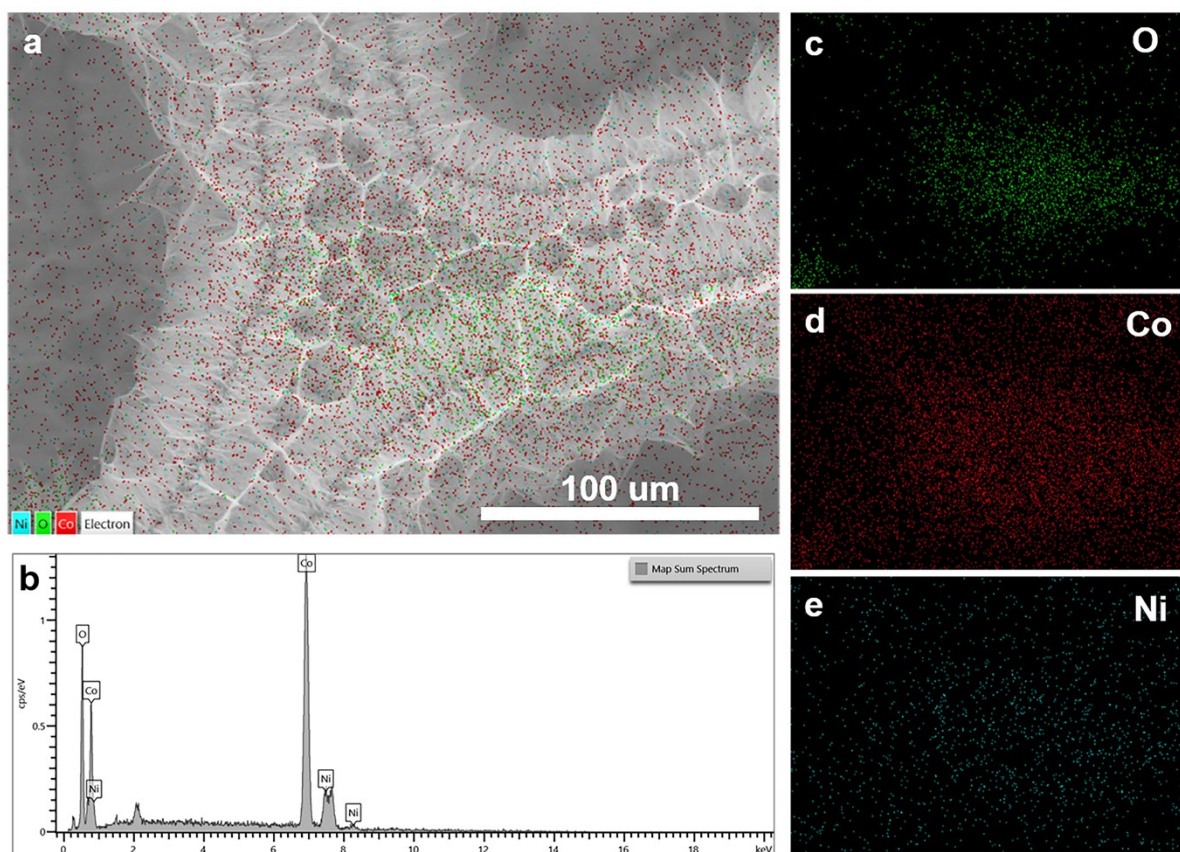

**Fig. S4.** (a) SEM image of elemental mapping ( $\text{Co}_3\text{O}_4\text{/NF}$ ); (b-e) EDS elemental mapping images of (c) O, (d) Co, (e) Ni.

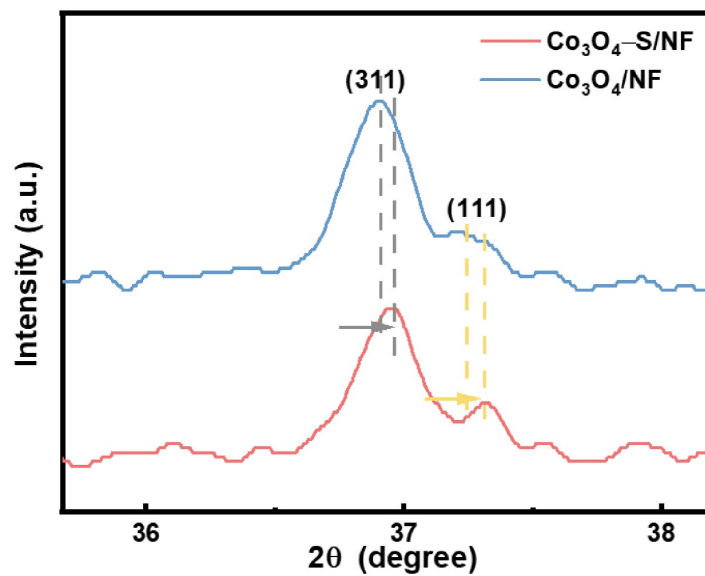

Fig. S5. Enlarge XRD pattern at 36°–38°.

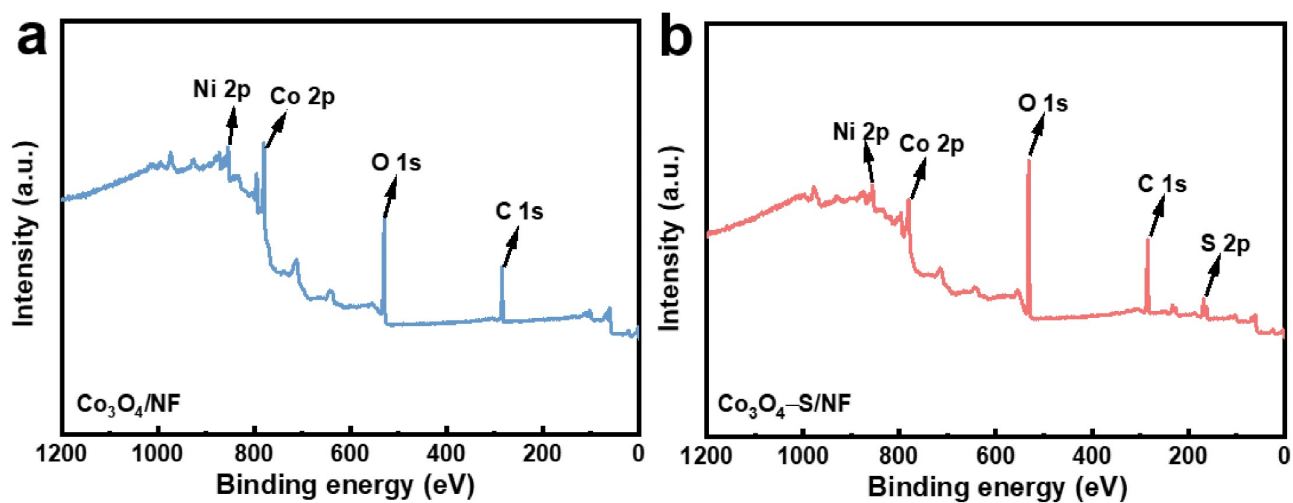

Fig. S6. The XPS spectrum of (a)  $\text{Co}_3\text{O}_4/\text{NF}$  and (b)  $\text{Co}_3\text{O}_4\text{-S}/\text{NF}$ .

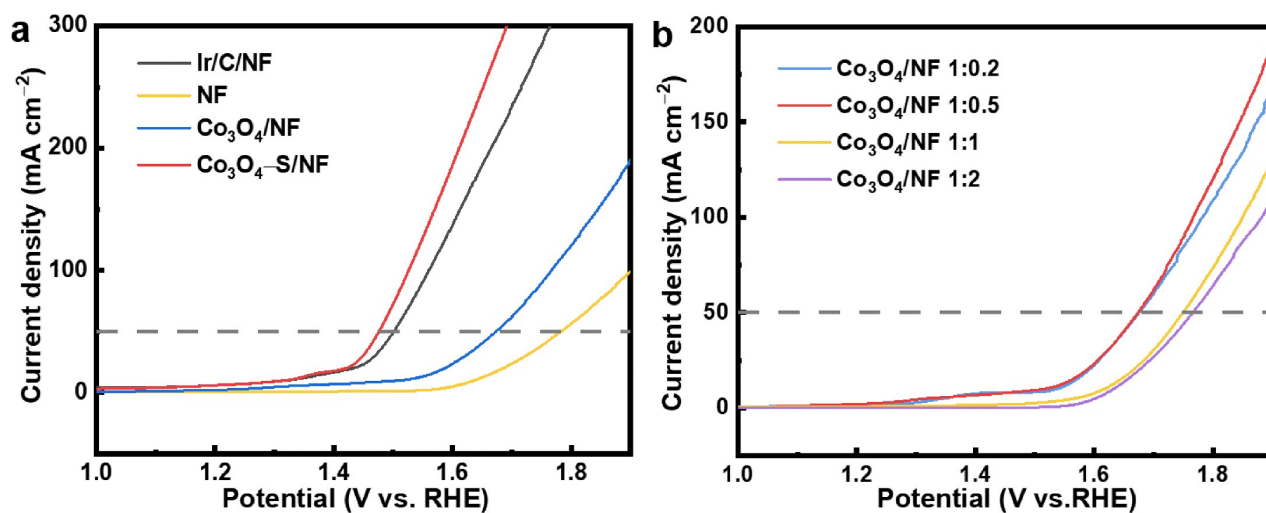

**Fig. S7.** (a) OER polarization curves of the catalysts; (b) OER polarization curves of the Co<sub>3</sub>O<sub>4</sub>/NF synthesized with different reactant ratios in 1.0 M KOH (cobalt nitrate hexahydrate: urea = 1:0.2,1:0.5,1:1,1:2).

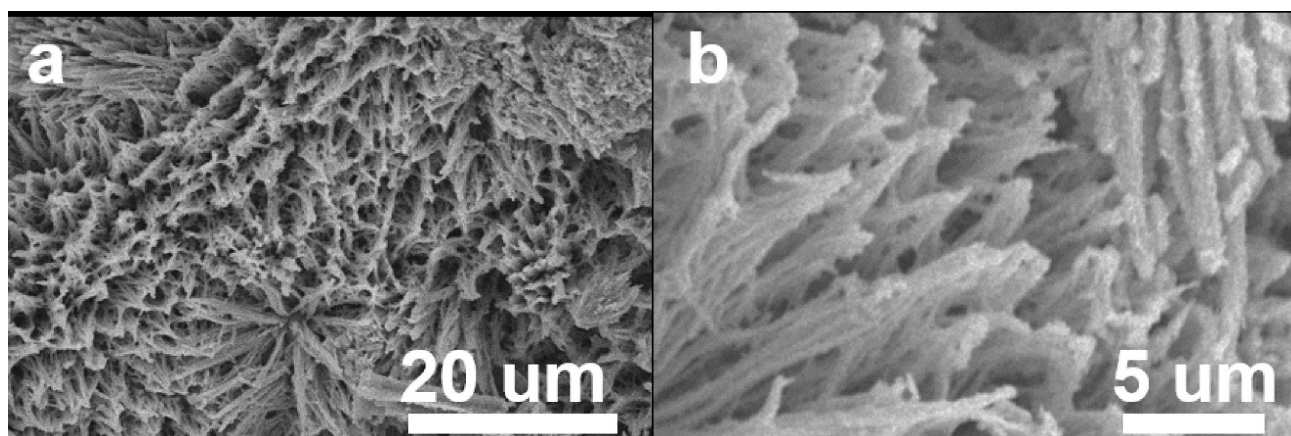

**Fig. S8.** (a-b) SEM images of Co<sub>3</sub>O<sub>4</sub>-S/NF after 12 h stability test (Cobalt nitrate hexahydrate: urea= 1:0.5).

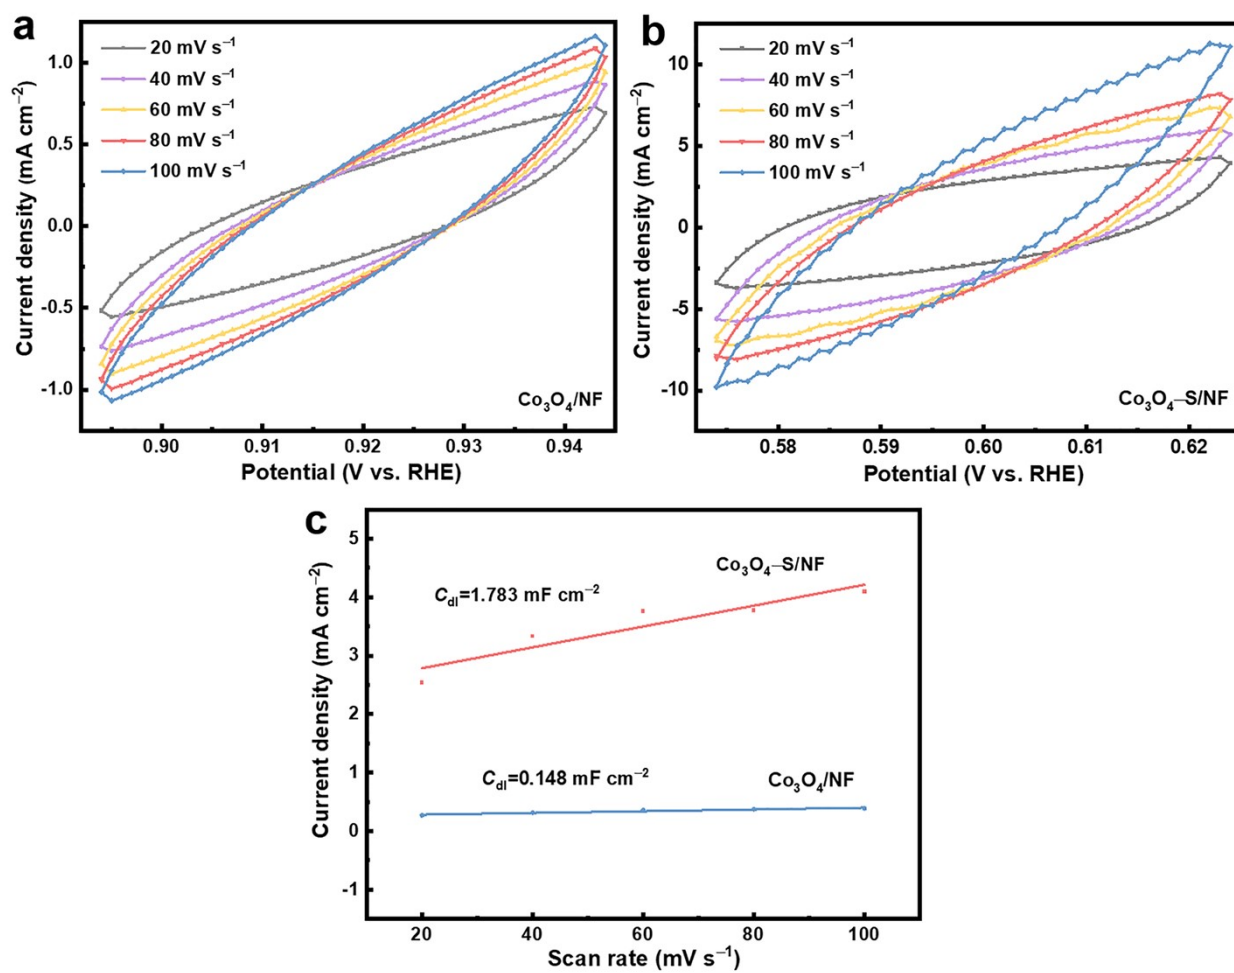

**Fig. S9.** CV curves of (a)  $\text{Co}_3\text{O}_4/\text{NF}$  and (b)  $\text{Co}_3\text{O}_4\text{-S}/\text{NF}$  at different sweep speeds; (c) Electrochemical double-layer capacitance ( $C_{dl}$ );

**Table S1** The fitting results of Nyquist plots of different electrocatalysts.

| <b>Catalyst</b>                      | <b><math>R_s</math> (<math>\Omega</math>)</b> | <b><math>R_{ct}</math> (<math>\Omega</math>)</b> | <b>CPE (F)</b> |
|--------------------------------------|-----------------------------------------------|--------------------------------------------------|----------------|
| NF                                   | 7.196                                         | 65.67                                            | 0.735          |
| Ir/C/NF                              | 6.564                                         | 54.06                                            | 0.618          |
| Co <sub>3</sub> O <sub>4</sub> /NF   | 6.974                                         | 55.81                                            | 0.723          |
| Co <sub>3</sub> O <sub>4</sub> -S/NF | 6.567                                         | 40.46                                            | 0.732          |
